# Supplementary material for: Replacing sedentary time with physical activity or sleep: effects on cancer-related cognitive impairment in breast cancer survivors
Source: Springer Nature journal article supplement (doi:10.1186/s12885-018-4603-3), 2018-06-25
Supplement: MOESM1 [file 15878344]

# ReFLECT Study

## Instructions:

Thank you for agreeing to participate in the study, **R**elationships among Cognitive **F**unction, **L**ifestyle, and **E**xercise after **C**ancer **T**reatment (ReFLECT). This questionnaire will ask you a series of questions about yourself. There are no right or wrong answers and all we ask is that you provide responses that are as honest and accurate as possible. All responses are completely confidential and will not be used in any way that could link your responses to you.

Exercise Psychology Laboratory

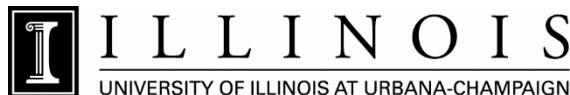

Please complete the following information about yourself. The information you provide will be used for research purposes only and will be held in **strictest confidence**.

1. What is your current Marital Status? (circle one)
  - Married
  - Partnered/Significant Other
  - Single
  - Divorced/Separated
  - Widowed
  
2. What is your **current** Age? \_\_\_\_\_
  
3. Number of Children \_\_\_\_\_
  
4. What is your current Employment Status? (please select only one)
  - \_\_\_\_\_ Full time – working at least 35 hours/week
  - \_\_\_\_\_ Part time – working less than 35 hours/week
  - \_\_\_\_\_ Retired, working part-time
  - \_\_\_\_\_ Retired, not working at all
  - \_\_\_\_\_ Laid off or unemployed
  - \_\_\_\_\_ Full time homemaker
  - \_\_\_\_\_ Other, Specify: \_\_\_\_\_
  
5. If you are working, what is your Present Occupation (the one you work most hours per week)?  
 \_\_\_\_\_
  
6. Years in present occupation: \_\_\_\_\_ years
  
7. If you are employed, how many days of work have you missed in the past month because you were sick?  
 \_\_\_\_\_
  
8. Race (circle one)
  - American Indian/Alaska Native
  - Asian
  - Native Hawaiian or Other Pacific Islander
  - Black or African American
  - White
  - More Than One Race
  - Unknown or Not Reported
  
9. Ethnicity (circle one)
  - Hispanic or Latino
  - Not Hispanic or Latino

10. Education (Circle highest level attained)

1. Less than 9<sup>th</sup> grade
2. 9<sup>th</sup> grade (Jr. High)
3. Partial High School
4. High School Graduate
5. 1-3 years of College or 2 yr College/Vocational/Technical school graduate
6. College/University Graduate
7. Masters Degree
8. PhD or Equivalent

11. Annual Household Income (circle one)

1. \$25,000 to \$34,999
2. \$35,000 to \$49,999
3. \$50,000 to \$74,999
4. \$75,000 to \$99,999
5. \$100,000 to \$149,999
6. \$150,000 or more

12. Do you have a psychological or social characteristic that may prevent you from accurately answering the study questions, completing the cognitive tests, or using the activity monitor (if applicable)?

Please choose one.

- Yes
- No

13. Have you used any cognitive training or assessment tools (e.g., BrainBaseline, Lumosity, etc.)?

- Yes
- No

If yes, what tool(s) have you used?

**Please answer the following questions about your breast cancer history.**

|                                                                                                                                                                                              |                                                  |                                   |
|----------------------------------------------------------------------------------------------------------------------------------------------------------------------------------------------|--------------------------------------------------|-----------------------------------|
| 1. When did you receive your first diagnosis of breast cancer?                                                                                                                               | _____                                            | _____                             |
|                                                                                                                                                                                              | Month                                            | Year                              |
| 2. What was your age at diagnosis? _____                                                                                                                                                     |                                                  |                                   |
| 3. What was the stage of your breast cancer? <input type="checkbox"/> 1 <input type="checkbox"/> 2 <input type="checkbox"/> 3 <input type="checkbox"/> 4 <input type="checkbox"/> Don't know |                                                  |                                   |
| 4. Was your breast cancer estrogen receptor positive? <input type="checkbox"/> Yes <input type="checkbox"/> No <input type="checkbox"/> Don't Know                                           |                                                  |                                   |
| 5. Are you currently receiving chemotherapy for your breast cancer? <input type="checkbox"/> Yes <input type="checkbox"/> No                                                                 |                                                  |                                   |
| 6. Have you ever received chemotherapy for breast cancer? <input type="checkbox"/> Yes <input type="checkbox"/> No                                                                           |                                                  |                                   |
| a. If yes, for how many months? _____                                                                                                                                                        |                                                  |                                   |
| b. Months since last dose of chemotherapy _____                                                                                                                                              |                                                  |                                   |
| 7. Are you currently receiving radiation therapy for your breast cancer? <input type="checkbox"/> Yes <input type="checkbox"/> No                                                            |                                                  |                                   |
| 8. Have you ever received radiation therapy for your breast cancer? <input type="checkbox"/> Yes <input type="checkbox"/> No                                                                 |                                                  |                                   |
| a. If yes, for how many months? _____                                                                                                                                                        |                                                  |                                   |
| b. Months since last dose of radiation therapy _____                                                                                                                                         |                                                  |                                   |
| 9. Did you have surgery for breast cancer? <input type="checkbox"/> Yes <input type="checkbox"/> No                                                                                          |                                                  |                                   |
| a. If yes, what surgery was done? _____                                                                                                                                                      |                                                  |                                   |
| b. Months since your surgery for breast cancer _____                                                                                                                                         |                                                  |                                   |
| 10. Which of the following medications are you currently taking?                                                                                                                             |                                                  |                                   |
| <input type="checkbox"/> anastrozole (Arimidex®)                                                                                                                                             | <input type="checkbox"/> tamoxifen (Nolvadex®)   |                                   |
| <input type="checkbox"/> letrozole (Femara®)                                                                                                                                                 | <input type="checkbox"/> toremifene (Fareston®)  |                                   |
| <input type="checkbox"/> exemestane (Aromasan®)                                                                                                                                              | <input type="checkbox"/> raloxifene (Evista®)    |                                   |
| <input type="checkbox"/> fulvestrant (Faslodex®)                                                                                                                                             | <input type="checkbox"/> Not taking any of these |                                   |
| a. Length of time you have been taking above medication _____                                                                                                                                |                                                  |                                   |
| 11. Have you experienced menopause? <input type="checkbox"/> Yes <input type="checkbox"/> No <input type="checkbox"/> Don't know                                                             |                                                  |                                   |
| 12. Which of the following describes your menopausal status at the time of diagnosis?                                                                                                        |                                                  |                                   |
| <input type="checkbox"/> Pre-menopausal                                                                                                                                                      | <input type="checkbox"/> Post-menopausal         | <input type="checkbox"/> Not sure |

|                                                                                                                                                                                                                                                                                                                                                                                                                                                                                                                                                                                                                                                                                                       |  |  |  |
|-------------------------------------------------------------------------------------------------------------------------------------------------------------------------------------------------------------------------------------------------------------------------------------------------------------------------------------------------------------------------------------------------------------------------------------------------------------------------------------------------------------------------------------------------------------------------------------------------------------------------------------------------------------------------------------------------------|--|--|--|
| <p>13. Have you been diagnosed with a breast cancer recurrence? (By recurrence we mean the breast cancer coming back in the same breast or a new breast cancer in either breast)</p> <p style="text-align: center;"><input type="checkbox"/> Yes      <input type="checkbox"/> No      <input type="checkbox"/> Don't know</p> <p>a. If yes, how many times _____</p> <p>b. If yes, when? _____</p> <p style="text-align: center;">Month    Year                      Month    Year</p> <p>c. What was the stage of your diagnosis?   <input type="checkbox"/> 1    <input type="checkbox"/> 2    <input type="checkbox"/> 3    <input type="checkbox"/> 4    <input type="checkbox"/> Don't know</p> |  |  |  |
| <p>14. Have you ever been diagnosed with any other type of cancer?</p> <p style="text-align: center;"><input type="checkbox"/> Yes      <input type="checkbox"/> No      <input type="checkbox"/> Don't know</p> <p>a. If yes, what type _____</p> <p>b. If yes, when? _____</p> <p style="text-align: center;">Month    Year                      Month    Year</p>                                                                                                                                                                                                                                                                                                                                  |  |  |  |

### General Health History

Has your doctor diagnosed you with any of the following conditions?

15. Arthritis (rheumatoid and/or osteoarthritis)  Yes     No
16. Osteoporosis  Yes     No
17. Asthma  Yes     No
18. Chronic obstructive pulmonary disease (COPD), acquired respiratory distress syndrome (ARDS) or emphysema  Yes     No
19. Angina  Yes     No
20. Congestive heart failure (or heart disease)  Yes     No
21. Heart attack (myocardial infarct)  Yes     No
22. Neurological disease (such as Multiple Sclerosis or Parkinson's)  Yes     No
23. Stroke or TIA  Yes     No
24. Dementia or organic brain syndrome  Yes     No
25. Peripheral vascular disease (for example blockages in the arteries of your neck, arms and/or legs)  Yes     No

- 26. Diabetes type I or II  Yes  No
- 27. Upper gastrointestinal disease (ulcer, hiatal hernia, reflux)  Yes  No
- 28. Tremors  Yes  No

If yes, which part(s) of your body are affected by tremors (e.g., hands, arms, face, voice)?

---

- 29. Depression  Yes  No
- 30. Anxiety or panic disorders  Yes  No
- 31. Visual impairment (such as cataracts, glaucoma, macular degeneration)  Yes  No
- 32. Hearing impairment (very hard of hearing, even with hearing aids)  Yes  No
- 33. Degenerative disc disease (back disease, spinal stenosis, or severe chronic back pain)  Yes  No
- 34. Obesity  Yes  No

35. What is your current weight in pounds? \_\_\_\_\_

36. What is your current height in inches? \_\_\_\_\_

37. Which of the following is true regarding your current weight in comparison to your pre-cancer weight?

I weigh less now. I weight about the same. I weight more now.

38. Are you satisfied with your current weight?

Yes No

a. If no, how much weight would you like to gain or lose?

Gain (+) \_\_\_\_\_ pounds Lose (-) \_\_\_\_\_ pounds Neither

39. How many cups of any caffeinated beverage do you drink daily (soft drinks, coffee, tea, etc.)?

\_\_\_\_\_

40. Do you currently smoke?

Yes No

a. If yes, how many packs a day do you smoke? \_\_\_\_\_

41. Did you smoke previously?

Yes

No

a. If you are a former smoker, how many years has it been since you quit? \_\_\_\_\_

42. Do you drink alcohol?

Yes

No

a. If yes, how many days per week do you drink alcohol? \_\_\_\_\_

b. How many drinks containing alcohol do you have on a typical day when you are drinking?

\_\_\_\_\_
